# Supplementary material
Source: publisher site journal article supplement (https://static.cambridge.org/content/id/urn:cambridge.org:id:article:S0043887120000027/resource/name/S0043887120000027supp001.pdf)
Supplement: Supplementary file 1 [file S0043887120000027supp001.pdf]

# **SUPPLEMENTARY MATERIAL**

## **DECENTRALIZATION WITHOUT DEMOCRACY**

By Katrina Kosec and Tewodaj Mogues

*World Politics*

doi: 10.1017/S0043887120000027

Replication data are available at:

Kosec, Katrina, and Tewodaj Mogues. 2020. "Replication data for: Decentralization without Democracy." Harvard Dataverse, V 1. doi: 10.7910/DVN/QTUFUW.

## Appendix A Theoretical Framework

This model reflects how public services provision is carried out under decentralization and centralization within a framework of autocracy, i.e. where electoral calculations do not drive resource allocation decisions. Under centralization, investment choices are made by the central government. Under decentralization, they are made by local governments.

Government can provide public goods in two sectors,  $n \in \{1, 2\}$ . Public spending in sector 1 is solely geared toward increasing citizens' production, while spending in sector 2 generates social services, which increase human capital, like healthcare. Health, in addition to being directly welfare-enhancing, in turn also affects production in the long-run—for example, by increasing labor productivity. In any given sector, government must select which of many alternative projects to carry out. Projects may be of low quality and thus produce no or few services, or they can be of good quality and thus result in high levels of service delivery. There is a set budget, which is normalized to 1 and can be distributed across sectors and, within sectors, across projects.

A government  $g \in \{A, B\}$  (central government and local government, respectively) selects the budget share  $0 \leq \phi_g \leq 1$  to spend on productive services, spending the rest on social services. There exists asymmetric information between central and local government on a given local jurisdiction's conditions: The local government of a jurisdiction has better information than the central government, making it more efficient in project selection and thus service provision. Specifically,  $\gamma_g$  constitutes an efficiency parameter in delivery of services, with  $0 \leq \gamma_A < \gamma_B \leq 1$ . Productive services provided thus amount to  $S_{1g} = \phi_g \gamma_g$  and social services to  $S_{2g} = (1 - \phi_g) \gamma_g$ .

Consider the government's problem. In an autocratic setting, citizens' preferences do not directly influence government behavior (irrespective of whether there is centralized or decentralized service delivery). Instead, government's utility depends on rents extracted at the rate of  $\delta \in (0, 1)$  from individuals' production, or output,  $O$ .<sup>25</sup> Citizens' production is a function of their utilization of productive services provided by government, and of being in good health,  $H$ , which increases labor productivity:  $O(S_{1g}, H(S_{2g}))$ . For simplicity, we let  $O(S_{1g}, H) = b_1 S_{1g} + H^\alpha$  and  $H(S_{2g}) = b_2 S_{2g}$ , where  $b_n > 0$  for  $n \in 1, 2$  represent factors of conversion of public services into private production and improved health, respectively. Citizens' production as a function of public services becomes:

$$O(S_{1g}, S_{2g}) = b_1 S_{1g} + (b_2 S_{2g})^\alpha \tag{S1}$$

where  $\alpha \in (0, 1)$  such that provision of productive services (in sector 1) contributes more to output than does provision of social services (in sector 2). The central government keeps all rents under centralization, whereas the central and local governments share the rents

---

<sup>25</sup>A dictator's public goods provision has been formally modelled variously. For example, Fearon (2011) represents the rents of an autocratic ruler as a choice variable, which is a share of the budget, with the remainder allocated to public goods; citizens' ability to protest based on noisy signals they receive of government's performance in producing public goods prevents all of the budget going to rents. Egorov, Guriev, and Sonin (2009) similarly include a noisy signal going to citizens, and additionally the autocrat's rents are in part derived as an exogenous share of citizens' production, which in turn depends on the quality of public goods provided. The latter model element is similar to ours.

under decentralization, with the share  $a \in (0, 1)$  of the rents going to local government. Government's utility is then:

$$U_g = R_g \{b_1 \phi \gamma_g + [b_2(1 - \phi) \gamma_g]^\alpha\} \quad (\text{S2})$$

where  $R_g = \delta$  for  $g = A$  (central government) and  $R_g = \delta a$  for  $g = B$  (local government). The resulting first-order condition for a government of type  $g$  is:

$$R_g b_1 \gamma_g = \frac{R_g \alpha (b_2 \gamma_g)^\alpha}{(1 - \phi_g^*)^{1-\alpha}} \quad (\text{S3})$$

This optimization problem results in the same rule for the budget share spent on productive services  $\phi_g^*$  for both central and local governments:

$$\phi_g^* = 1 - \frac{1}{\gamma_g} \left( \frac{\alpha (b_2)^\alpha}{b_1} \right)^{\frac{1}{1-\alpha}} \quad (\text{S4})$$

Inspection of this optimization rule reveals that the extent to which the government—central or local—invests in the productive sector instead of the social sector is decreasing in the degree to which provision of social services tends to raise output (that is, as  $\alpha$  increases).

The utility of citizens on a continuum, represented by  $i$ , depends both on  $i$ 's production  $O$ , and on  $i$ 's health  $H$ . We bring together core elements from two large bodies of literature in this regard: health as a form of human capital increases output (Smith, 1999), and health is also directly an element in the citizen's utility function for any given level of output or wealth (Viscusi and Evans, 1990; Levy and Nir, 2012).<sup>26</sup> Utility is then formulated as  $U_i(O(H), H)$ . We use a Cobb-Douglas function for utility with strict concavity in the elements and with equal elasticities for  $O$  and  $H$ , after accounting for the reduction in output by the amount government extracts in the form of rents, i.e.  $U_i = ((1 - \delta)O)^\beta H^\beta$ . The citizen's utility is then expressed as:

$$U_i = \{[b_1 \phi \gamma_g + (b_2(1 - \phi) \gamma_g)^\alpha] (1 - \delta)\}^\beta (b_2(1 - \phi) \gamma_g)^\beta \quad (\text{S5})$$

when ruled by government-type  $g$  (decentralized or centralized). The citizen's optimal budget share that it would like government to spend on productive services is:

$$\left[ b_1(1 - 2\phi_i^*) - (1 + \alpha) \gamma_g^{\alpha-1} (b_2(1 - \phi_i^*))^\alpha \right] \cdot \left\{ \beta (b_2(1 - \delta))^\beta (1 - \phi_i^*)^{\beta-1} \gamma_g^{2\beta} [b_1 \phi_i^* + \gamma_g^{\alpha-1} (b_2(1 - \phi_i^*))^\alpha]^{\beta-1} \right\} = 0 \quad (\text{S6})$$

The model yields three main predictions regarding the impacts of decentralization in an autocratic context.

---

<sup>26</sup>This notion has been motivated in various ways in the literature, including the decline in utility due to pain and suffering (and in the extreme case, death) that ill-health causes, or the decline in utility due to the fact that expenses to reduce sickness crowd out other forms of consumption.

*P1. The government—whether central or local—will allocate a larger proportion of the budget to productive services than would the citizen.*

To see this, recall that the characteristic of any standard maximization problem applies also to that of the citizen's: the first derivative of the utility function with respect to the choice variable (budget share allocated to productive services) is zero at the citizen's optimal budget share, it is positive at a lower-than-optimal budget share, and it is negative at a higher-than-optimal budget share:  $\frac{\partial U_i}{\partial \phi} = 0$  at  $\phi = \phi_i^*$ ,  $\frac{\partial U_i}{\partial \phi} > 0 \forall \phi < \phi_i^*$ , and  $\frac{\partial U_i}{\partial \phi} < 0 \forall \phi > \phi_i^*$ . Given that in Eq. (S6), the second left-hand side multiplicative expression (in curly braces) is positive for any value of the parameters, then if  $\phi_g^* > \phi_i^*$ , inserting the government's optimal budget share into the first multiplicative term in Eq. (S6) would result in a negative expression, or:

$$b_1(1 - 2\phi_g^*) - (1 + \alpha)\gamma_g^{\alpha-1}(b_2(1 - \phi_g^*))^\alpha < 0 \quad (\text{S7})$$

To show that this is the case, we insert Eq. (S4) into (S7), which becomes:

$$-b_1 + \frac{2b_1}{\gamma_g} \left( \frac{\alpha(b_2)^\alpha}{b_1} \right)^{\frac{1}{1-\alpha}} - \frac{1 + \alpha}{\gamma_g^{1-\alpha}} \left[ \frac{b_2}{\gamma_g} \left( \frac{\alpha(b_2)^\alpha}{b_1} \right)^{\frac{1}{1-\alpha}} \right]^\alpha < 0 \quad (\text{S8})$$

Rearranging the left-hand side into two additive terms, we get:

$$-\frac{1}{\gamma_g} \left( \frac{\alpha b_2}{b_1} \right)^{\frac{\alpha}{1-\alpha}} (1 - \alpha) - b_1 < 0 \quad (\text{S9})$$

Since each of the two summands on the left-hand side are negative  $\forall \gamma, \alpha, b_1$  and  $b_2$ , the inequality in Eq. (S9) holds. Thus,  $\phi_g^* > \phi_i^* \forall g \in \{A, B\}$ , proving prediction *P1*.

*P2. Under decentralization, the local government will invest a larger proportion of its budget in productive services and a smaller proportion in social services than would the central government under centralization.*

Since  $\phi_g^*$  is increasing in  $\gamma_g$  in Eq. (S4), and given that  $\gamma_B > \gamma_A$ , this implies that  $\phi_B^* > \phi_A^*$ , and that therefore *P2* holds.

*P3. The level of productive services delivery under decentralization is higher than under centralization. However, under both regimes, the level of social services is the same.*

Since  $\phi_B^* > \phi_A^*$  and  $\gamma_B > \gamma_A$ , it follows that  $S_{1B}^* > S_{1A}^*$ . The equality in social service provision is shown by initially assuming this holds, i.e.  $S_{2A}^* = S_{2B}^*$ . Setting equal the social services provision by central and local government gives  $(1 - \phi_A^*)\gamma_A = (1 - \phi_B^*)\gamma_B$ . Substituting in Eq. (S4) for the optimal choice of each government yields:

$$\left\{ 1 - \left[ 1 - \frac{1}{\gamma_A} \left( \frac{\alpha(b_2)^\alpha}{b_1} \right)^{\frac{1}{1-\alpha}} \right] \right\} \gamma_A = \left\{ 1 - \left[ 1 - \frac{1}{\gamma_B} \left( \frac{\alpha(b_2)^\alpha}{b_1} \right)^{\frac{1}{1-\alpha}} \right] \right\} \gamma_B \quad (\text{S10})$$

This holds for any value of  $\alpha, b_1$ , and  $b_2$ . Prediction *P3* is thus validated.

## Appendix B Systematic Literature Review

We conducted a systematic review of empirical studies that examine the impact of decentralization on public service provision, published in some of the top political science, economics, and interdisciplinary journals in the last 20 years. Search terms included a combination of terms related to, and used in the context of, our independent variable of interest (“decentralization,” “devolution,” “fragmentation,” and/or “recentralization”) alongside terms related to our outcome variable of interest (“public services,” “public investment,” “public expenditures” and/or “government expenditures”). We did not include studies that involved decentralization of the delivery of a single service to lower tiers of government, to maintain a focus on a broader restructuring of government.

Targeted political science journals included the *American Journal of Political Science*, *American Political Science Review*, *British Journal of Political Science*, *Comparative Political Studies*, *Electoral Studies*, *Political Behavior*, *Quarterly Journal of Political Science*, *Journal of Politics*, and *World Politics*. Targeted economics and interdisciplinary journals included *American Economic Journal (AEJ): Economic Policy*, *American Economic Review*, *Economic Development and Cultural Change*, *Journal of Development Economics*, *Journal of Political Economy*, *Journal of Public Economics*, *Quarterly Journal of Economics*, *Proceedings of the National Academy of Sciences*, *Review of Economics and Statistics*, *Review of Economic Studies*, *Science*, *Social Science Quarterly*, *Economic Journal*, and *World Development*.

For each study, we documented the country or regional context, Polity IV score of the country/region (taking an average in the case of multi-country studies), GDP per capita of the country/region (taking an average in the case of multi-country studies), primary empirical method used (e.g., case study, observational study, quasi-experiment, or experiment), key independent variable(s), dependent variable(s) employed, service type (social services, productive services, both, or total spending), and the effect of decentralization on public service provision (positive, meaning better public goods provision and/or higher government expenditures/investments; negative; mixed; or null). The Polity IV score and GDP per capita (in constant, 2010 U.S. dollars) are taken from the closest available year that pre-dates the first year of the study, and are based on Polity IV (2018) and World Bank (2019). For studies involving multiple countries, we took the averages (unweighted) of all countries with available data. The effect of decentralization is determined based on the overall tone in the paper—with particular attention to its abstract. We identified a total of 20 studies. It is very possible that we have omitted important studies, possibly because their abstracts did not use the specific search terms utilized above, or because of researcher oversight. However, we consider these to be a central set of studies capturing most of what was published in the last 20 years in this subset of journals on this research question.

Several patterns emerge. First, the studies consider countries with a vast range of Polity IV scores. Exactly half of studies have a negative Polity IV score and half have a positive score; five studies consider autocracies, six consider democracies, and the remaining nine consider hybrid regimes (“anocracies,” with a Polity IV score between -5 and 5). Second, the methods employed are generally quasi-experimental (in 13 of the 20 studies), as in this study, though there are three observational studies and four case studies. However, only one of these quasi-experimental studies employs a regression discontinuity design; the

rest employ either difference-in-differences, instrumental variables, or some variant of a fixed effects model. Third, the majority of studies focus solely on social services. Only 30 percent of studies consider either productive services or both social and productive services. Fourth, the evidence is highly mixed. While seven studies identify positive impacts of decentralization, three identify negative impacts, eight identify mixed impacts, and two identify largely null effects. Finally, focusing on those studies that consider social services (either solely or in combination with productive services), we observe distinct impacts of decentralization depending on the Polity IV score. Among seven social services studies with negative Polity IV scores, only one identified a positive impact of decentralization. In contrast, among the nine social services studies with positive Polity IV scores, the majority identified a positive impact of decentralization. Thus, improvements in social services due to decentralization appear to be most heavily concentrated in relatively more democratic study contexts. Further, the paucity of studies considering productive services suggests the difficulty of drawing firm conclusions from existing literature on how decentralization impacts their delivery under different regime types (democracy, anocracy, or autocracy).

Our study contributes to the literature on the effects of decentralization in autocratic contexts and hybrid regimes. Studies from our systematic review on regimes with negative Polity IV scores (10 total) have largely focused on China (Li, Lu, and Wang, 2016; Su, Li, and Tao, 2019; Wang, Zheng, and Zhao, 2011; Wong et al., 2013), but also consider Vietnam (Malesky, Nguyen, and Tran, 2014), Uganda (Francis and James, 2003), Bolivia (Faguet, 2013), Sub-Saharan Africa (Grossman, Pierskalla, and Dean, 2017), and larger collections of countries (Enikolopov and Zhuravskaya, 2007; Ponce-Rodriguez et al., 2018). Only four of these 10 consider productive service outcomes (either solely or along with social service outcomes), and only two of these further use a quasi-experimental empirical strategy like we do; the other two rely on case studies, in which attributing causality is arguably more challenging.

Table S1: Systematic review of literature on the effect of decentralization on service delivery

| Author (Year)                          | Context              | Polity IV   | Real GDP        | Method                                              | Key independent variable(s)                                                                                                                           | Dependent variable(s)                                                                                                                                       | Service type        | Effect   |
|----------------------------------------|----------------------|-------------|-----------------|-----------------------------------------------------|-------------------------------------------------------------------------------------------------------------------------------------------------------|-------------------------------------------------------------------------------------------------------------------------------------------------------------|---------------------|----------|
| Barankay and Lockwood (2007)           | Switzerland          | 10 (1981)   | 55,466.2 (1981) | Quasi-experimental (FE)                             | Share of education expenditures from local governments in a canton                                                                                    | Share of 19 year old population obtaining university entry qualification                                                                                    | Social services     | Positive |
| Dowding and Mer-goupis (2003)          | United Kingdom       | 10 (1997)   | 32,476.5 (1997) | Observational (ordered probit)                      | 1. Metropolitan level analysis: # councils in metro area<br>2. Council level analysis: tax base, revenue support grant per capita                     | 5-ladder categorical variable for the degree of satisfaction with local public services                                                                     | Both                | Mixed    |
| Enikolopov and Zhuravskaya (2007)      | 75 countries         | -2.1 (1974) | 3243.3 (1974)   | Quasi-experimental (IV)                             | Share of subnational revenues in total government revenues                                                                                            | Average measure of public goods in 1975–2000                                                                                                                | Social service      | Mixed    |
| Faguet (2013)                          | Bolivia              | -4 (1979)   | 1,708.2 (1979)  | Case study (before and after)                       | Decentralization                                                                                                                                      | 1. Investment in public services<br>2. Development outcomes such as infant/ maternal mortality rate, improved water/ sanitation/ roads                      | Both                | Mixed    |
| Faguet and Sanchez (2008)              | Bolivia and Colombia | 8.5 (1986)  | 2,682.6 (1986)  | Quasi-experimental (IV)                             | Own resources (revenue raised from local taxes and charges) as a share of total expenditure                                                           | Year-on-year increase in student enrollment in public schools                                                                                               | Social services     | Positive |
| Francis and James (2003)               | Uganda               | -4 (1996)   | 334.9 (1996)    | Case study                                          | Decentralization                                                                                                                                      | 1. Capacity of the primary school system<br>2. Level of resources allocated to productive sectors, especially agriculture                                   | Both                | Mixed    |
| Goodman (2018)                         | United States        | 8 (1971)    | 23,670.3 (1971) | Quasi-experimental (DiD)                            | 6 dummy variables for local autonomy: city and county level tax and expenditure limits, debt limit, and home rule                                     | Special district share of local public spending                                                                                                             | Social services     | Null     |
| Grossman, Pier-skalla, and Dean (2017) | Sub-Saharan Africa   | -3.7 (1960) | 1,091.5 (1960)  | Quasi-experimental (FE and IV)                      | The number of top-tier regional governments per 1 million citizens in a country                                                                       | Summary index for the quality of service provision, constructed from outcomes such as life expectancy at birth and primary school completion rate           | Social services     | Positive |
| Hatfield and Kosec (2013)              | United States        | 8 (1968)    | 23,055.4 (1968) | Quasi-experimental (IV)                             | Logged number of county governments                                                                                                                   | Expenditures per capita                                                                                                                                     | Total spending      | Positive |
| Heller, Harilal, and Chaudhuri (2007)  | India                | 9 (2001)    | 851.6 (2001)    | Case study                                          | Decentralization from state government to village council                                                                                             | Fraction of respondents reporting improvements in public services including primary health care, child care and child development, and primary education    | Social services     | Positive |
| Lindaman and Thurmaier (2002)          | 104 countries        | 1.2 (1989)  | 11395.3 (1989)  | Observational (OLS)                                 | Three measures of fiscal decentralization, such as share of subnational expenditures in total government expenditures                                 | Human development index                                                                                                                                     | Social service      | Positive |
| Linder (2009)                          | Mozambique           | 5 (2004)    | 327.8 (2004)    | Case study                                          | Decentralization                                                                                                                                      | Service delivery delay days                                                                                                                                 | Both                | Positive |
| Li, Lu, and Wang (2016)                | China                | -7 (1994)   | 1,116 (1994)    | Quasi-experimental (DiD)                            | Dummy – country having adopted the decentralization reform                                                                                            | 1. Logged total public investment<br>2. Logged pro-growth investment                                                                                        | Total spending      | Negative |
| Malesky, Nguyen, and Tran (2014)       | Vietnam              | -7 (2005)   | 1,018.1 (2005)  | Quasi-experimental (DiD)                            | Recentralization (dummy – commune having District People’s Councils abolished)                                                                        | 1. Dummies – access to various public services<br>2. Indices of transportation, agriculture, healthcare, education, comms., & business development services | Both                | Negative |
| Ponce-Rodriguez et al. (2018)          | 135 countries        | -1.8 (1975) | 6,215 (1975)    | Observational (GMM) and quasi-experimental (FE)     | 1. Dummy – democratic decentralization, party centralization<br>2. Dummy – democratic decentralization, party decentralization                        | Education and health outcomes (e.g. primary school enrollment and infant mortality rate)                                                                    | Social services     | Mixed    |
| Sanogo (2019)                          | Côte d’Ivoire        | 4 (2000)    | 1,355.3 (2000)  | Quasi-experimental (IV)                             | Logged ratio of own revenues to total revenues of a département                                                                                       | An adjusted multidimensional poverty index for access to public services                                                                                    | Social services     | Mixed    |
| Su, Li, and Tao (2019)                 | China                | -7 (1993)   | 998.4 (1993)    | Quasi-experimental (fuzzy regression discontinuity) | Dummy – county being designated as a Nationally Designated Poverty county in 1994 and thus receiving earmarked transfers with clear spending mandates | 1. Local government expenditures per capita<br>2. Social expenditure, education expenditure, and public sector employment                                   | Total spending      | Null     |
| Wang, Zheng, and Zhao (2011)           | China                | -7 (1998)   | 1,538.7 (1998)  | Quasi-experimental (DiD)                            | Dummy – county having launched a fiscal decentralization reform                                                                                       | Share of public spending devoted to education in county                                                                                                     | Social services     | Negative |
| Wong et al. (2013)                     | China                | -7 (2002)   | 2061.2 (2002)   | Quasi-experimental (FE)                             | 1. Share of county’s contribution to village road project<br>2. Dummy – township govt. manages road construction                                      | 1. Road quality score<br>2. Per kilometer cost of each road                                                                                                 | Productive services | Mixed    |
| Zhuravskaya (2000)                     | Russia               | 5 (1992)    | 9047.7 (1991)   | Quasi-experimental (FE)                             | A dummy for shared and own revenues shifting in same direction                                                                                        | 1. Infant mortality<br>2. Unavailability of schools                                                                                                         | Social service      | Mixed    |

Notes: Polity IV score and GDP per capita are taken from the closest year that pre-dates the first year of the data set, or else the earliest year that the data are available. For studies involving multiple countries, the Polity IV score and GDP per capita are both calculated by averaging across all countries with available data in the year pre-dating the study. Real GDP per capita is expressed in 2010 USD. DiD refers to a difference-in-differences methodology, and FE refers to use of fixed effects (geographic and/or temporal).

## Appendix C Village- and Region-level Statistics

Table S2: Comparison between villages in decentralized and nondecentralized areas

| Description                                                                                     | Mean                              |                       | t-statistic |           |
|-------------------------------------------------------------------------------------------------|-----------------------------------|-----------------------|-------------|-----------|
|                                                                                                 | Decentra-<br>lized                | Non-<br>decentralized |             |           |
| <i>Interaction between local leaders</i>                                                        |                                   |                       |             |           |
| Extension agent spoke personally with village traditional leader within the last month          | 0.88                              | 0.30                  | -3.717***   |           |
| Village chair met with extension agent within the last month                                    | 0.94                              | 0.58                  | -2.609**    |           |
| Extension agent spoke personally with zonal agriculture staff within the last month             | 0.29                              | 0.00                  | -1.964*     |           |
| Village chair met with village cabinet member within the last month                             | 0.94                              | 0.67                  | -2.075**    |           |
| Number of contacts village council member had with village cabinet member in the last 12 months | 8.61                              | 0.00                  | -1.993*     |           |
| <i>Presence of local groups and associations</i>                                                |                                   |                       |             |           |
| This group/ association exists in the village:                                                  | Community social insurance group  | 0.89                  | 0.17        | -5.525*** |
|                                                                                                 | Microfinance institution          | 0.44                  | 0.00        | -2.993*** |
|                                                                                                 | Youth association                 | 0.88                  | 0.17        | -5.325*** |
|                                                                                                 | Women's association               | 0.82                  | 0.50        | -1.906*   |
| Share of adults in village that belong to a cooperative                                         | 29.72                             | 1.25                  | -2.875***   |           |
| <i>Frequency of local meetings</i>                                                              |                                   |                       |             |           |
| No. of times in past year that a meeting was called by:                                         | Traditional community association | 7.22                  | 0.00        | -2.582**  |
|                                                                                                 | Village council                   | 7.17                  | 2.33        | -2.902*** |
|                                                                                                 | Extension agent                   | 6.72                  | 2.00        | -1.757*   |
|                                                                                                 | District government               | 4.33                  | 1.75        | -1.862*   |

*Notes:* Mean-comparison of village-level variables between decentralized and nondecentralized areas. Number of observations (villages) varies between 26 and 30. Statistical significance level of the mean differences is indicated with \*  $p < 0.10$ , \*\*  $p < 0.05$ , and \*\*\*  $p < 0.01$ .

*Source:* IFPRI-EEPRI (2008–2009).



Table S3: Per capita local government expenditures (in birr) in decentralized and nondecentralized regions during the study period

| Region                                        | Agriculture<br>and rural<br>development | Water<br>supply | Both<br>sectors | Total |
|-----------------------------------------------|-----------------------------------------|-----------------|-----------------|-------|
| <i>Decentralized</i>                          |                                         |                 |                 |       |
| Amhara                                        | 20.8                                    | 2.9             | 23.6            | 193.0 |
| Oromia                                        | 36.8                                    | 2.3             | 39.2            | 171.8 |
| SNNP                                          | 20.3                                    | 2.0             | 22.3            | 154.1 |
| Tigray                                        | 22.5                                    | 4.3             | 26.8            | 242.3 |
| Weighted average                              | 27.6                                    | 2.5             | 30.1            | 178.1 |
| <i>Not decentralized</i>                      |                                         |                 |                 |       |
| Afar                                          | 28.0                                    | 6.4             | 34.5            | 195.0 |
| Beneshangul-Gumuz                             | 24.2                                    | 2.5             | 26.6            | 213.4 |
| Gambela                                       | 46.1                                    | 8.5             | 54.6            | 447.3 |
| Weighted average                              | 29.1                                    | 5.4             | 34.5            | 232.3 |
| Ratio of decentralized<br>to nondecentralized | 1.0                                     | 0.5             | 0.9             | 0.8   |

*Notes:* Values for 2008, in birr. Average per capita values for the two groups of regions are population-weighted, using regional population sizes of the 2007 census, linearly extrapolated to 2008.

*Source:* Authors' calculations, based on data from the Ethiopian Ministry of Finance and Economic Development.

## Appendix D Summary Statistics

Table S4: Summary statistics, main sample for analysis (2008–09)

| Variable                                                                  | Mean  | S.D.  | N    |
|---------------------------------------------------------------------------|-------|-------|------|
| <i>Panel A: Household-level outcomes</i>                                  |       |       |      |
| Uses modern inputs (at least one of four)                                 | 0.31  | 0.46  | 837  |
| Number of modern inputs used                                              | 0.41  | 0.67  | 837  |
| Uses fertilizer                                                           | 0.15  | 0.36  | 837  |
| Uses insecticide                                                          | 0.13  | 0.33  | 837  |
| Uses herbicide                                                            | 0.05  | 0.21  | 837  |
| Uses improved seed                                                        | 0.08  | 0.28  | 837  |
| Uses improved drinking water source during the wet season                 | 0.07  | 0.25  | 838  |
| Uses improved drinking water source during the dry season                 | 0.05  | 0.21  | 838  |
| Time to get to water (min.) during the wet season                         | 21.52 | 28.98 | 739  |
| Time to get to water (min.) during the dry season                         | 26.99 | 37.56 | 743  |
| <i>Panel B: Independent variables in household-level analysis</i>         |       |       |      |
| Decentralized                                                             | 0.50  | 0.50  | 838  |
| Male head                                                                 | 0.80  | 0.40  | 838  |
| Literate head                                                             | 0.42  | 0.49  | 838  |
| Secondary-educated head                                                   | 0.11  | 0.31  | 838  |
| Head's age                                                                | 42.72 | 14.81 | 838  |
| Household size                                                            | 6.09  | 2.51  | 838  |
| Landowner                                                                 | 0.81  | 0.39  | 838  |
| Homeowner                                                                 | 0.97  | 0.18  | 838  |
| Multi-room house                                                          | 0.45  | 0.50  | 838  |
| Large-livestock owner                                                     | 0.61  | 0.49  | 838  |
| Head's ethnicity's share of population                                    | 0.86  | 0.26  | 838  |
| <i>Panel C: Individual-level outcomes</i>                                 |       |       |      |
| Visited a demonstration plot, home, or research station                   | 0.03  | 0.18  | 1436 |
| Learned a new farming practice from district agricultural extension agent | 0.03  | 0.17  | 1440 |
| Attended meeting to discuss agricultural issues                           | 0.20  | 0.40  | 1435 |
| Attended district government-organized meeting to discuss agri. issues    | 0.15  | 0.36  | 1435 |
| Attended village government-organized meeting to discuss agri. issues     | 0.06  | 0.25  | 1435 |
| Meeting held in individual's village to discuss agricultural issues       | 0.93  | 0.26  | 1435 |
| Satisfied with water quality during the wet season                        | 0.51  | 0.50  | 827  |
| Satisfied with water quality during the dry season                        | 0.48  | 0.50  | 827  |
| Very satisfied with government-organized meetings to discuss agri. issues | 0.79  | 0.41  | 231  |
| Very satisfied with government-provided agri. inputs                      | 0.53  | 0.50  | 277  |
| <i>Panel D: Independent variables in individual-level analysis</i>        |       |       |      |
| Decentralized                                                             | 0.53  | 0.50  | 1440 |
| Male                                                                      | 0.46  | 0.50  | 1440 |
| Literate                                                                  | 0.31  | 0.46  | 1440 |
| Secondary education                                                       | 0.07  | 0.26  | 1440 |
| Age                                                                       | 39.24 | 14.04 | 1440 |
| Household size                                                            | 6.26  | 2.48  | 1440 |
| Landowner                                                                 | 0.83  | 0.37  | 1440 |
| Homeowner                                                                 | 0.97  | 0.18  | 1440 |
| Multi-room house                                                          | 0.47  | 0.50  | 1440 |
| Large-livestock owner                                                     | 0.62  | 0.49  | 1440 |
| Respondent's ethnicity's share of population                              | 0.85  | 0.26  | 1440 |

*Notes:* Sample sizes reflect use of a 75km bandwidth.

*Sources:* IFPRI–EEPRI (2008–2009).

## Appendix E Validation of econometric model

In this section we describe in more detail the three analyses we use to validate our econometric model. First, in Appendix Table S5, we present the regression results depicted visually in Figure 4 and discussed in the sub-section on ‘Balance and Validation of Econometric Model.’ These broadly show that prior to decentralization, we see smooth changes in the characteristics of individuals and households at regional boundaries separating later decentralized and nondecentralized regions. In addition to generally finding balance as described in that sub-section, the point estimates themselves are also generally modest in size. For example, even if the coefficient on decentralization had been statistically significant (it is not), decentralization would only increase the head’s age by about 1.8 years, and household size by 0.37 members. It is also important to highlight that the sample sizes used in our balance tests are significantly larger than those in our main analysis—for most outcomes, over 3,300 observations, compared to at most 1,440 observations in the main analyses. Thus, despite massively increasing our ability to detect statistically significant effects, we find very few.

For the second validation analysis, we examine whether or not there are abrupt changes in key outcomes at region boundaries between nondecentralized and later decentralized regions in the period *preceding* decentralization (1999–2000). We used two nationally-representative household surveys pre-dating decentralization: the 1999–2000 Agricultural Sample Survey (CSA, 2000) and the 2000 Demographic and Health Survey (DHS, 2000). These surveys do not contain information on all 20 of our outcomes. However, they contain several of the same or similar variables. The Agricultural Sample Survey indicates whether the household used three modern agricultural inputs examined in Table 4: fertilizer, pesticide, and improved seed (while our main analysis separates pesticide into insecticide and herbicide, this survey lumps them together). The DHS includes information on whether the household has a piped water source, an improved water source, and the amount of time it takes to reach that main source—outcomes similar to those in Table 6. As both surveys were carried out in all regions of Ethiopia, we can consider a larger number of region borders that separate nondecentralized and later decentralized regions than are in our main dataset—though, for comparability, we omit border segments that include regions not in our main analysis (i.e. Somali or Harari). We can also examine the entire length of borders rather than a small subset as in the main analysis. By increasing our sample size, we significantly increase our power and thus our ability to detect any size effect. Again for comparability, we utilize the bandwidth from our main analyses (i.e. observations within 75km of the border).

Using these outcomes and estimating Eq. (1), Appendix Table S6 presents the impacts of our “placebo” decentralization dummy on pre-decentralization usage of modern agricultural inputs. Columns (1) and (2) have as outcomes an indicator for using modern inputs (either fertilizer, pesticide, or improved seed) and the number of modern inputs used (ranging from 0–3), respectively. Columns, (3)–(5) are dummies for use of each of the three, respectively. We see that farmers on either side of, but in close proximity to, the subsequent policy-change border have statistically insignificant differences in whether they use modern agricultural inputs and in the number of modern inputs used. When we consider the individual inputs themselves, one exception is the dummy for fertilizer use. This significant result should also be interpreted in light of our now much higher power. Appendix Table S7 presents the impacts of our placebo decentralization dummy on pre-decentralization access to piped and

improved water sources and the time required to get to the main water source. Once again, we see that farmers on either side of a border that will later be a policy change boundary are substantially similar. There are no discernible differences in access to either piped water or improved water. We find some indication that subsequently decentralized areas are more proximate to water sources—which would if anything bias us toward identifying improvements in water due to decentralization (something we do not find).

Our third validation analysis uses our main dataset (from 2008–09), but considers a boundary separating two regions that were both decentralized. This “placebo” policy change boundary, separating the Amhara and Tigray regions, is shown in Figure 2d. If one were concerned that there is an important and discrete policy change at *any* region boundary—and that this is driving our results—then we should see differences in service delivery outcomes on either side of this “placebo” policy change boundary. Accordingly, we randomly assign one of these two decentralized regions (Tigray) to be “nondecentralized” (by symmetry, if we had chosen Amhara, significance would be the same and the coefficients on decentralization would simply be multiplied by -1), and observe whether this “placebo decentralization dummy” has a statistically significant impact on access to services in Appendix Table S8. We consider all of the outcomes from our main regression specifications; only one, whether the district holds village meetings on agriculture-related issues, is missing due to no variation in this particular subset of the data, for which the variable has a high mean. The placebo decentralization dummy is statistically significant for only 2 of 13 outcomes related to productive services (compared to being statistically significant for 11 of the 13 in our main analyses): improved seed (significant at the 0.10 level) and being very satisfied with government-organized agricultural meetings (significant at the 0.05 level). This suggests that our main results are due to decentralization itself and not other changes that occur at regional borders.

Table S5: Balance on household characteristics for policy change borders in 2000

|      |                                        | Coeff. on<br>decentralization | S.E. on<br>decentralization | Observations | $R^2$ |
|------|----------------------------------------|-------------------------------|-----------------------------|--------------|-------|
| (1)  | Male head                              | 0.0527                        | (0.033)                     | 3,373        | 0.792 |
| (2)  | Literate head                          | 0.1513**                      | (0.057)                     | 3,364        | 0.373 |
| (3)  | Secondary-educated head                | 0.0257                        | (0.023)                     | 3,367        | 0.110 |
| (4)  | Head's age                             | 1.7933                        | (1.462)                     | 3,373        | 0.900 |
| (5)  | Household size                         | 0.3692                        | (0.278)                     | 3,373        | 0.812 |
| (6)  | Landowner                              | 0.1753*                       | (0.092)                     | 3,372        | 0.863 |
| (7)  | Homeowner                              | -0.0495                       | (0.054)                     | 3,372        | 0.933 |
| (8)  | Multi-room house                       | 0.0764                        | (0.063)                     | 3,373        | 0.329 |
| (9)  | Large-livestock owner                  | 0.0639                        | (0.071)                     | 3,372        | 0.693 |
| (10) | Weight-for-height Z-score (age 0-5)    | 0.0783                        | (0.136)                     | 1,757        | 0.310 |
| (11) | Head's ethnicity's share of population | -0.0351                       | (0.091)                     | 2,708        | 0.941 |

*Notes:* We estimate Eq. (1) using the sample of all rural households within 75km of the border with a region with opposite decentralization status, matching the analyses of Tables 2–6. We exclude only border segments that contain a region not used in these main analyses (specifically, any borders including Somali or Harari), for comparability. Because our outcomes are household characteristics, we do not control for these in any regressions. Clustered standard errors (at the village level) in parentheses; statistical significance of coefficient estimates at 0.01\*\*\*, 0.05\*\*, and 0.1\* levels.

*Source:* DHS (2000).

Table S6: Pre-decentralization placebo analysis: Use of modern agricultural inputs in 2000

|                                  | Uses<br>modern<br>inputs<br>(1) | Number<br>of modern<br>inputs used<br>(2) | Uses<br>fertilizer<br>(3) | Uses<br>pesticide<br>(4) | Uses<br>improved<br>seed<br>(5) |
|----------------------------------|---------------------------------|-------------------------------------------|---------------------------|--------------------------|---------------------------------|
| Decentralized in subsequent year | 0.0704<br>(0.057)               | 0.1758<br>(0.108)                         | 0.1120<br>(0.066)         | 0.0417**<br>(0.019)      | 0.0221<br>(0.042)               |
| Mean of outcome                  | 0.242                           | 0.330                                     | 0.180                     | 0.049                    | 0.102                           |
| N                                | 9,361                           | 9,361                                     | 9,361                     | 9,361                    | 9,361                           |
| $R^2$                            | 0.390                           | 0.354                                     | 0.378                     | 0.146                    | 0.211                           |

*Notes:* Control variables include all of those from Eq. (1) that are available in the data source; data on ethnicity, as well as data on two socio-economic status variables (a dummy for house ownership and a dummy for having a multi-room house) were not available; we capture the latter by including a control for agricultural land area (square meters). We employ a bandwidth of 75km, matching the analyses of Tables 2–6. Clustered standard errors (at the village level) in parentheses; statistical significance of coefficient estimates at 0.01\*\*\*, 0.05\*\*, and 0.1\* levels.

*Source:* CSA (2000).

Table S7: Pre-decentralization placebo analysis: Access to drinking water in 2000

|                                  | Piped water<br>source<br>(1) | Improved<br>water source<br>(2) | Time to get<br>to water (min.)<br>(3) |
|----------------------------------|------------------------------|---------------------------------|---------------------------------------|
| Decentralized in subsequent year | -0.0058<br>(0.027)           | -0.0296<br>(0.107)              | -39.2872**<br>(16.682)                |
| Mean of outcome                  | 0.04                         | 0.19                            | 49.22                                 |
| N                                | 2,694                        | 2,694                           | 2,691                                 |
| $R^2$                            | 0.267                        | 0.413                           | 0.628                                 |

*Notes:* Control variables include all of those from Eq. (1). We employ a bandwidth of 75km, matching the analyses of Tables 2–6. Clustered standard errors (at the village level) in parentheses; statistical significance of coefficient estimates at 0.01\*\*\*, 0.05\*\*, and 0.1\* levels. *Source:* DHS (2000).

Table S8: Placebo analysis, showing a lack of significant impacts of “decentralization” at a regional border with no policy change

| Dependent Variable                                                      |                     | Coeff.    | S.E.     | Obs. | $R^2$ |
|-------------------------------------------------------------------------|---------------------|-----------|----------|------|-------|
| Attended meeting to discuss agricultural issues                         |                     | -0.0904   | (0.173)  | 458  | 0.609 |
| Attended meeting to discuss agricultural issues organized by:           | District government | 0.3217    | (0.292)  | 458  | 0.472 |
|                                                                         | Village government  | -0.2694   | (0.236)  | 458  | 0.373 |
| Visited a demonstration-plot, home, or research station                 |                     | -0.1516   | (0.151)  | 457  | 0.140 |
| Learned new farming practice from district agricultural extension agent |                     | -0.3064   | (0.371)  | 459  | 0.330 |
| Uses modern inputs                                                      |                     | -0.5050   | (0.364)  | 280  | 0.595 |
| No. of modern inputs used                                               |                     | -1.2478   | (0.923)  | 280  | 0.575 |
| Uses fertilizer                                                         |                     | -0.2025   | (0.481)  | 280  | 0.626 |
| Uses insecticide                                                        |                     | -0.2654   | (0.388)  | 280  | 0.303 |
| Uses herbicide                                                          |                     | -0.3293   | (0.206)  | 280  | 0.141 |
| Uses improved seed                                                      |                     | -0.4507*  | (0.214)  | 280  | 0.340 |
| Very satisfied with government-organized agricultural meetings          |                     | -0.2251** | (0.094)  | 203  | 0.938 |
| Very satisfied with government-provided agricultural inputs             |                     | 0.2529    | (0.304)  | 84   | 0.972 |
| Use of improved drinking water during the:                              | Wet season          | -0.2920*  | (0.151)  | 280  | 0.328 |
|                                                                         | Dry season          | -0.3361** | (0.130)  | 280  | 0.324 |
| Time to get to water (min.) during the:                                 | Wet season          | -26.5136  | (21.470) | 221  | 0.633 |
|                                                                         | Dry season          | -22.8419  | (23.541) | 221  | 0.668 |
| Dummy – satisfied with water quality during the:                        | Wet season          | 0.0772    | (0.224)  | 220  | 0.850 |
|                                                                         | Dry season          | -0.4547   | (0.266)  | 221  | 0.844 |

*Notes:* All coefficients reflect the coefficient on a dummy for decentralization in a regression of the listed outcome variable on the decentralization dummy and the full set of control variables from Eq. (1). Clustered standard errors (at the village level) in parentheses; statistical significance of coefficient estimates at 0.01\*\*\*, 0.05\*\*, and 0.1\* levels.

*Source:* IFPRI-EEPRI (2008–2009).

## Appendix F Robustness

### Appendix F.1 Alternate bandwidths

A potential concern with our analyses is that they rely on data from households that are not always very close to a regional border separating a decentralized and a nondecentralized region. This could serve to make the observations on either side inherently less comparable. While we show balance using this same bandwidth in Appendix Table S5, there could theoretically be other, unobservable factors on which observations on either side of the border are inherently not comparable as we get further away from the border. We thus check the robustness of our results to two alternate bandwidths: 50km from the regional border (this includes 87 percent of our sample) and 25km of the regional border (this includes 79 percent of our sample).

Appendix Table S9 presents all of our previous regression results using the narrower bandwidths. We find that the point estimates are largely unchanged—both in statistical significance and magnitude. Of our 14 productive service delivery outcomes (i.e. those related to agricultural services), all previous findings of a statistically significant impact of decentralization still hold. For our 6 water outcomes, one previously statistically significant finding (for travel time to water) becomes insignificant in both the 50km and 25km bandwidth regressions—if anything further bolstering the evidence that decentralization does not impact social services delivery, and only impacts productive services delivery. Overall, we take these findings as evidence that our main results are not sensitive to the choice of bandwidth we have selected.

### Appendix F.2 Alternate specifications

Our findings on the impacts of decentralization are similar to those obtained from estimating a specification suggested by Dell (2010): a semi-parametric RD using a quadratic polynomial in longitude and latitude (see Appendix Table S10). Rather than explicitly allowing covariates influencing service delivery outcomes to change smoothly as one moves along a policy change border and as one moves away from it at a 90 degree angle, this specification instead allows smooth changes in each cardinal direction (i.e. in  $X$ - $Y$  space). While the magnitudes of some coefficients change, we again find statistically significant, positive impacts of decentralization on productive services (agricultural services) outcomes, and mixed or null findings for social services (drinking water) outcomes. Decentralization no longer increases learning from extension agents, or reported satisfaction with agricultural meetings and inputs, but it now increases take-up of *all* modern inputs—including insecticide and improved seed. The results also now suggest that decentralization increases the frequency with which meetings focused on agriculture are held in the village, and not only attendance rates. We conclude that our results are robust to different assumptions of how household and policy characteristics change over space.

### Appendix F.3 Analysis of district pairs previously in the same province

Next, we check robustness of the results to considering *only* observations along regional borders for which the observations on opposite sides of this recently-drawn border were



all in the *same* top-tier sub-national unit (i.e. province) prior to 1995. Two of our three study locations—namely, the regional boundary between Ibanu and Yaso districts, and the boundary between Bati and Telalak districts—fit this criterion. For these two pairs, one would expect observations on either side of the border to be especially comparable.

Appendix Table [S11](#) shows that our results are indeed largely unchanged when we consider only these two least-problematic district pairs. That is, even when we require that our comparison households spent most of recent history (53 years) under the same top-tier administrative landscape (i.e. the same province), we find that decentralization improves productive service delivery yet has little consistent impact on social services. Of our 14 productive service delivery outcomes (i.e. those related to agricultural services), for none does a previous finding of a statistically significant impact of decentralization no longer hold. Just as in [Appendix F.1](#), for our 6 water outcomes, one previously statistically significant finding (for travel time to water) becomes insignificant—if anything further bolstering the evidence that decentralization does not impact social services delivery, and only impacts productive services delivery. Overall, we take these findings as evidence that our main results are not due to highly divergent history, culture, ethnicity, or other such characteristics on either side of the regional boundaries we analyze.

Table S9: Robustness of results to use of narrower bandwidths

| Dependent Variable                                                      | Within 50 km  |            |          | Within 25 km |            |          |       |
|-------------------------------------------------------------------------|---------------|------------|----------|--------------|------------|----------|-------|
|                                                                         | Coeff.        | S.E.       | N        | Coeff.       | S.E.       | N        |       |
| Attended meeting to discuss agricultural issues                         | 0.5903***     | (0.119)    | 1,268    | 0.4706***    | (0.116)    | 1,156    |       |
| Attended meeting to discuss agricultural issues organized by:           | District gov. | 0.4858***  | (0.106)  | 1,268        | 0.3670***  | (0.101)  | 1,156 |
|                                                                         | Village gov.  | 0.1890***  | (0.033)  | 1,268        | 0.1880***  | (0.037)  | 1,156 |
| Meeting held in village to discuss agricultural issues                  | 0.5399        | (0.532)    | 1,268    | 0.5473       | (0.540)    | 1,156    |       |
| Visited a demonstration-plot, home, or research station                 | 0.5491***     | (0.032)    | 1,269    | 0.5426***    | (0.041)    | 1,158    |       |
| Learned new farming practice from district agricultural extension agent | 0.1689**      | (0.065)    | 1,273    | 0.1430*      | (0.076)    | 1,161    |       |
| Uses modern inputs                                                      | 0.8944***     | (0.111)    | 732      | 0.8816***    | (0.134)    | 663      |       |
| No. of modern inputs used                                               | 1.0788***     | (0.212)    | 732      | 1.0513***    | (0.266)    | 663      |       |
| Uses fertilizer                                                         | 0.8922***     | (0.039)    | 732      | 0.8981***    | (0.040)    | 663      |       |
| Uses insecticide                                                        | 0.0180        | (0.123)    | 732      | 0.0398       | (0.150)    | 663      |       |
| Uses herbicide                                                          | 0.2194***     | (0.032)    | 732      | 0.2155***    | (0.040)    | 663      |       |
| Uses improved seed                                                      | -0.0508       | (0.119)    | 732      | -0.1021      | (0.137)    | 663      |       |
| Very satisfied with government-organized agricultural meetings          | 1.1989**      | (0.477)    | 184      | 1.1347**     | (0.519)    | 172      |       |
| Very satisfied with government-provided agricultural inputs             | 1.1396**      | (0.459)    | 284      | 1.0954**     | (0.456)    | 282      |       |
| Use of improved drinking water during the:                              | Wet season    | 0.3067***  | (0.077)  | 733          | 0.3404***  | (0.088)  | 664   |
|                                                                         | Dry season    | 0.0440     | (0.074)  | 733          | 0.0725     | (0.084)  | 664   |
| Time to get to water (min.) during the:                                 | Wet season    | 13.4880    | (9.104)  | 639          | 12.4464    | (8.994)  | 574   |
|                                                                         | Dry season    | 11.2857    | (13.930) | 643          | 10.5475    | (13.705) | 578   |
| Dummy – satisfied with water quality during the:                        | Wet season    | -0.9610*** | (0.217)  | 702          | -0.9469*** | (0.249)  | 630   |
|                                                                         | Dry season    | -0.6218*** | (0.183)  | 702          | -0.5842**  | (0.204)  | 630   |

*Notes:* All coefficients reflect the coefficient on a dummy for decentralization in a regression of the listed outcome variable on the decentralization dummy and the full set of control variables from Eq. (1). Clustered standard errors (at the village level) in parentheses; statistical significance of coefficient estimates at 0.01\*\*\*, 0.05\*\*, and 0.1\* levels.

*Source:* IFPRI–EEPRI (2008–2009).

Table S10: Robustness of results to a semi-parametric regression discontinuity approach

| Dependent Variable                                                                       |                     | Coeff.     | S.E.     | Obs.  | $R^2$ |
|------------------------------------------------------------------------------------------|---------------------|------------|----------|-------|-------|
| Attended meeting to discuss agricultural issues                                          |                     | 0.2831**   | (0.120)  | 1,435 | 0.337 |
| Attended meeting to discuss agricultural issues organized by:                            | District government | 0.0373     | (0.126)  | 1,435 | 0.266 |
|                                                                                          | Village government  | 0.2643***  | (0.065)  | 1,435 | 0.150 |
| Meeting held in village to discuss agricultural issues                                   |                     | 0.6796*    | (0.373)  | 1,435 | 0.962 |
| Visited a demonstration-plot, home, or research station                                  |                     | 0.0558     | (0.039)  | 1,436 | 0.081 |
| Learned new farming practice from district agricultural extension agent                  |                     | 0.1246     | (0.074)  | 1,440 | 0.086 |
| Uses modern inputs                                                                       |                     | 0.7639***  | (0.120)  | 837   | 0.789 |
| No. of modern inputs used                                                                |                     | 1.1172***  | (0.198)  | 837   | 0.721 |
| Uses fertilizer                                                                          |                     | 0.1900**   | (0.070)  | 837   | 0.867 |
| Uses insecticide                                                                         |                     | 0.3074***  | (0.094)  | 837   | 0.667 |
| Uses herbicide                                                                           |                     | 0.1307**   | (0.048)  | 837   | 0.283 |
| Uses improved seed                                                                       |                     | 0.4891***  | (0.155)  | 837   | 0.302 |
| Very satisfied with government-organized agricultural meetings                           |                     | 0.0935     | (0.781)  | 231   | 0.842 |
| Very satisfied with government-provided agricultural inputs provided agricultural inputs |                     | -0.4848    | (0.302)  | 284   | 0.657 |
| Use of improved drinking water during the:                                               | Wet season          | -0.2758*** | (0.097)  | 838   | 0.158 |
|                                                                                          | Dry season          | -0.1828**  | (0.086)  | 838   | 0.108 |
| Time to get to water (min.) during the:                                                  | Wet season          | -32.4971** | (12.537) | 739   | 0.529 |
|                                                                                          | Dry season          | -29.1480   | (19.696) | 743   | 0.574 |
| Dummy – satisfied with water quality during the:                                         | Wet season          | 0.0784     | (0.237)  | 827   | 0.577 |
|                                                                                          | Dry season          | 0.1783     | (0.241)  | 827   | 0.551 |

*Notes:* Coefficients are those on a decentralization dummy in a regression using a quadratic polynomial in longitude and latitude similar to Dell (2010) and our full set of controls from Eq. (1). Clustered standard errors (at the village level) in parentheses; statistical significance of coefficient estimates at 0.01\*\*\*, 0.05\*\*, and 0.1\* levels.

*Source:* IFPRI–EEPRI (2008–2009).

Table S11: Robustness of results to using only the two border segments for which both districts were in the same province during 1942–1995

| Dependent Variable                                                                       |                     | Coeff.     | S.E.     | Obs. | $R^2$ |
|------------------------------------------------------------------------------------------|---------------------|------------|----------|------|-------|
| Attended meeting to discuss agricultural issues                                          |                     | 0.5333***  | (0.127)  | 964  | 0.331 |
| Attended meeting to discuss agricultural issues organized by:                            | District government | 0.3986***  | (0.114)  | 964  | 0.265 |
|                                                                                          | Village government  | 0.2162***  | (0.044)  | 964  | 0.162 |
| Meeting held in village to discuss agricultural issues                                   |                     | 0.5606     | (0.555)  | 964  | 0.976 |
| Visited a demonstration-plot, home, or research station                                  |                     | 0.5124***  | (0.053)  | 966  | 0.124 |
| Learned new farming practice from district agricultural extension agent                  |                     | 0.2235***  | (0.025)  | 969  | 0.057 |
| Uses modern inputs                                                                       |                     | 0.9601***  | (0.131)  | 557  | 0.840 |
| No. of modern inputs used                                                                |                     | 1.0998***  | (0.340)  | 557  | 0.767 |
| Uses fertilizer                                                                          |                     | 0.8937***  | (0.038)  | 557  | 0.899 |
| Uses insecticide                                                                         |                     | 0.0729     | (0.195)  | 557  | 0.689 |
| Uses herbicide                                                                           |                     | 0.2099***  | (0.055)  | 557  | 0.298 |
| Uses improved seed                                                                       |                     | -0.0768    | (0.160)  | 557  | 0.385 |
| Very satisfied with government-organized agricultural meetings                           |                     | 1.1043*    | (0.602)  | 140  | 0.861 |
| Very satisfied with government-provided agricultural inputs provided agricultural inputs |                     | 1.1978**   | (0.467)  | 263  | 0.635 |
| Use of improved drinking water during the:                                               | Wet season          | 0.2842***  | (0.085)  | 558  | 0.186 |
|                                                                                          | Dry season          | 0.0052     | (0.071)  | 558  | 0.112 |
| Time to get to water (min.) during the:                                                  | Wet season          | 9.1431     | (9.055)  | 476  | 0.600 |
|                                                                                          | Dry season          | 8.1653     | (13.693) | 480  | 0.680 |
| Dummy – satisfied with water quality during the:                                         | Wet season          | -1.0746*** | (0.250)  | 530  | 0.631 |
|                                                                                          | Dry season          | -0.6710*** | (0.202)  | 530  | 0.601 |

*Notes:* Coefficients are those on a decentralization dummy when estimating Eq. (1) with our full set of controls. Clustered standard errors (at the village level) in parentheses; statistical significance of coefficient estimates at 0.01\*\*\*, 0.05\*\*, and 0.1\* levels.

*Source:* IFPRI–EEPRI (2008–2009).

## Appendix References

- Barankay, Iwan, and Ben Lockwood. 2007. "Decentralization and the Productive Efficiency of Government: Evidence from Swiss Cantons." *Journal of Public Economics* 91 (5–6): 1197–1218. doi: 10.1016/j.jpubeco.2006.11.006.
- CSA. 2000. "Agricultural Sample Survey." Central Statistical Authority. <http://www.csa.gov.et/>.
- Dell, Melissa. 2010. "The Persistent Effects of Peru's Mining Mita." *Econometrica* 78 (6): 1863–1903. doi: 10.3982/ecta8121.
- DHS. 2000. "Ethiopia Demographic and Health Survey." <http://www.measuredhs.com/>.
- Dowding, Keith, and Thanos Mergoupis. 2003. "Fragmentation, Fiscal Mobility, and Efficiency." *Journal of Politics* 65 (4): 1190–1207. doi: 10.1111/1468-2508.t01-1-00132.
- Egorov, Georgy, Sergei Guriev, and Konstantin Sonin. 2009. "Why Resource-poor Dictators allow Freer Media: A Theory and Evidence from Panel Data." *American Political Science Review* 103 (4): 645–668. doi: 10.1017/s0003055409990219.
- Enikolopov, Ruben, and Ekaterina Zhuravskaya. 2007. "Decentralization and Political Institutions." *Journal of Public Economics* 91 (11): 2261–2290. doi: 10.1016/j.jpubeco.2007.02.006.
- Faguet, Jean-Paul. 2013. "Can Subnational Autonomy Strengthen Democracy in Bolivia?" *Publius: The Journal of Federalism* 44 (1): 51–81. doi: 10.1093/publius/pjt020.
- Faguet, Jean-Paul, and Fabio Sanchez. 2008. "Decentralization's Effects on Educational outcomes in Bolivia and Colombia." *World Development* 36 (7): 1294–1316. doi: 10.1016/j.worlddev.2007.06.021.
- Fearon, James D. 2011. "Self-enforcing Democracy." *Quarterly Journal of Economics* 126 (4): 1661–1708. doi: 10.1093/qje/qjr038.
- Francis, Paul, and Robert James. 2003. "Balancing Rural Poverty Reduction and Citizen Participation: The Contradictions of Uganda's Decentralization Program." *World Development* 31 (2): 325–337. doi: 10.1016/s0305-750x(02)00190-0.
- Goodman, Christopher B. 2018. "Usage of Specialized Service Delivery: Evidence from Contiguous Counties." *Publius: The Journal of Federalism* 48 (4): 686–708. doi: 10.1093/publius/pjx065.
- Grossman, Guy, John H. Pierskalla, and Emma Boswell Dean. 2017. "Government Fragmentation and Public Goods Provision." *Journal of Politics* 79 (3): 823–840. doi: 10.1086/690305.
- Hatfield, John William, and Katrina Kosec. 2013. "Federal Competition and Economic Growth." *Journal of Public Economics* 97 (C): 144–159. doi: 10.1016/j.jpubeco.2012.08.005.
- Heller, Patrick, KN Harilal, and Shubham Chaudhuri. 2007. "Building Local Democracy: Evaluating the Impact of Decentralization in Kerala, India." *World Development* 35 (4): 626–648. doi: 10.1016/j.worlddev.2006.07.001.
- IFPRI–EEPRI. 2008–2009. "Governance and Rural Services Survey. International Food Policy Research Institute, and Ethiopian Economic Policy Research Institute." Dataset.
- Levy, Moshe, and Adi Rizansky Nir. 2012. "The Utility of Health and Wealth." *Journal of Health Economics* 31 (2): 379–392. doi: 10.1016/j.jhealeco.2012.02.003.
- Li, Pei, Yi Lu, and Jin Wang. 2016. "Does flattening Government Improve Economic Performance? Evidence from China." *Journal of Development Economics* 123: 18–37. doi: 10.1016/j.jdeveco.2016.07.002.

- Lindaman, Kara, and Kurt Thurmaier. 2002. "Beyond Efficiency and Economy: An Examination of Basic Needs and Fiscal Decentralization." *Economic Development and Cultural Change* 50 (4): 915–934. doi: 10.1086/342760.
- Linder, Wolf. 2009. "On the Merits of Decentralization in Young Democracies." *Publius: The Journal of Federalism* 40 (1): 1–30. doi: 10.1093/publius/pjp027.
- Malesky, Edmund J, Cuong Viet Nguyen, and Anh Tran. 2014. "The Impact of Recentralization on Public Services: A Difference-in-Differences Analysis of the Abolition of Elected Councils in Vietnam." *American Political Science Review* 108 (1): 144–168. doi; 10.1017/s0003055413000580.
- Polity IV. 2018. "Polity IV Project: Political Regime Characteristics and Transitions, 1800–2018." Center for Systemic Peace. <https://www.systemicpeace.org/polity/polity4.htm>.
- Ponce-Rodriguez, Raul A, Charles R Hankla, Jorge Martinez-Vazquez, and Eunice Heredia-Ortiz. 2018. "Rethinking the Political Economy of Decentralization: How Elections and Parties Shape the Provision of Local Public Goods." *Publius: The Journal of Federalism* 48 (4): 523–558. doi: 10.1093/publius/pjy003.
- Sanogo, Tiangboho. 2019. "Does Fiscal Decentralization Enhance Citizens' access to Public Services and Reduce Poverty? Evidence from Côte d'Ivoire Municipalities in a Conflict Setting." *World Development* 113: 204–221. doi: 10.1016/j.worlddev.2018.09.008.
- Smith, James P. 1999. "Healthy Bodies and Thick Wallets: The Dual Relation between Health and Economic Status." *Journal of Economic Perspectives* 13 (2): 145–166. doi: 10.1257/jep.13.2.145.
- Su, Fubing, Ming Li, and Ran Tao. 2019. "Transfer-Based Decentralization and Poverty Alleviation: Evidence from a Quasi-Experiment in China." *Publius: The Journal of Federalism* 49(02): 694–718. doi: 10.1093/publius/pjy044.
- Viscusi, W Kip, and William N Evans. 1990. "Utility Functions that Depend on Health Status: Estimates and Economic Implications." *American Economic Review* 80 (3): 353–374. <https://scholarship.law.vanderbilt.edu/faculty--publications/139/>.
- Wang, Wen, Xinye Zheng, and Zhirong Zhao. 2011. "Fiscal Reform and Public Education Spending: A Quasi-natural Experiment of Fiscal Decentralization in China." *Publius: The Journal of Federalism* 42 (2): 334–356. doi: 10.1093/publius/pjr039.
- Wong, Ho Lun, Renfu Luo, Linxiu Zhang, and Scott Rozelle. 2013. "Providing Quality Infrastructure in Rural Villages: The Case of Rural Roads in China." *Journal of Development Economics* 103: 262–274. doi: 10.1016/j.jdeveco.2013.03.002.
- World Bank. 2019. "World Development Indicators." <https://datacatalog.worldbank.org/dataset/world-development-indicators>.
- Zhuravskaya, Ekaterina V. 2000. "Incentives to Provide Local Public Goods: Fiscal Federalism, Russian Style." *Journal of Public Economics* 76: 337–368. doi: 10.1016/s0047-2727(99)00090-0.
